# Supplementary material for: Opening magnetic hysteresis via improving the planarity of equatorial coordination by hydrogen bonding
Source: Royal Society of Chemistry journal article supplement (doi:10.1039/d2dt01107g), 2022-01-01
Supplement: d2dt01107g1.pdf [file d2dt01107g1.pdf]

## Supporting Information for the Manuscript

### Opening Magnetic Hysteresis *via* Improving Planarity of Equatorial Coordination by Hydrogen Bonding

Yun-Xia Qu, Ze-Yu Ruan, Bang-Heng Lyu, Yan-Cong Chen, Guo-Zhang Huang, Jun-Liang Liu\*  
and Ming-Liang Tong\*

---

Key Laboratory of Bioinorganic and Synthetic Chemistry of Ministry of Education, School of Chemistry,  
Sun Yat-Sen University, 510006 Guangzhou, Guangdong, P. R. China.

\*Corresponding authors. Email: liujliang5@mail.sysu.edu.cn; tongml@mail.sysu.edu.cn.

### Table of Contents

|                                                   |           |
|---------------------------------------------------|-----------|
| <b>Part 1. Experimental Section.....</b>          | <b>2</b>  |
| <b>Part 2. Crystal Data and Structures.....</b>   | <b>4</b>  |
| <b>Part 3. Magnetic Characterization.....</b>     | <b>9</b>  |
| <b>Part 4. Photoluminescence Spectra.....</b>     | <b>16</b> |
| <b>Part 5. <i>Ab initio</i> Calculations.....</b> | <b>19</b> |
| <b>Part 6. References.....</b>                    | <b>22</b> |

## S1 Experimental Section

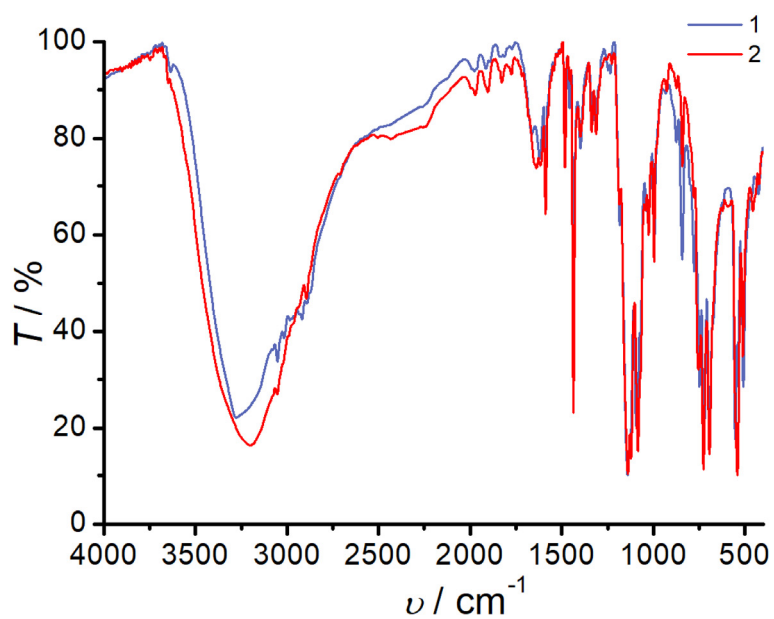

**Fig S1.** Infrared spectra for **1** (blue) and **2** (red).

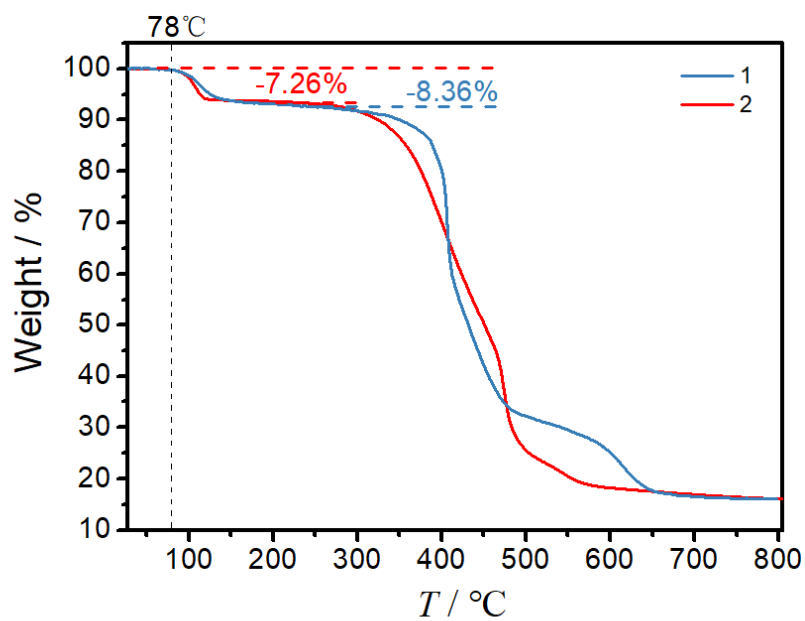

**Fig S2.** Thermogravimetric analysis for **1** (blue) and **2** (red) under  $\text{N}_2$  atmosphere ( $10 \text{ K min}^{-1}$ ). The dashed lines correspond to the theoretical weight loss percentage of 1 EtOH plus 6  $\text{H}_2\text{O}$  for **1** and 0.5EtOH plus 5.5 $\text{H}_2\text{O}$  for **2**, respectively.

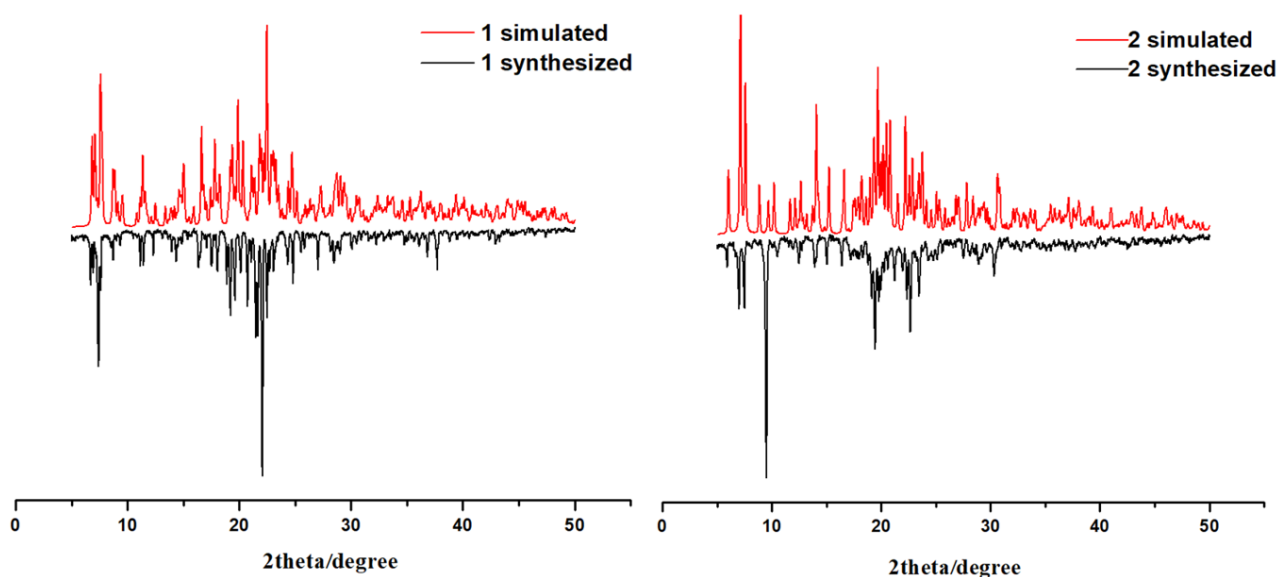

**Fig S3.** PXRD patterns of **1** (*left*) and **2** (*right*) compared with the simulated pattern from the single crystal structure.

**Computational Details.** All *ab initio* calculations were carried out with Open MOLCAS version 18.09<sup>1</sup> and are of the CASSCF/RASSI type. The Cholesky decomposition threshold was set to  $1 \times 10^{-8}$  to save disk space. Fragments of single-crystal structure of **1** and **2** were included, in which the butylene groups being replaced with ethyl groups, and the coordinates of atoms were extracted from the experimentally determined crystal structure. ANO-RCC-VTZP basis set have been employed for Dy atom, ANO-RCC-VDZP for O atoms, ANO-RCC-VDZ for C, P and I atoms and ANO-RCC-MB for H atoms.<sup>2-4</sup> Active space of the CASSCF method included nine electrons in seven 4f orbitals of Dy<sup>III</sup>. 21 sextets was optimized in state-averaged calculations, and then 21 sextets was mixed by spin-orbit coupling using RASSI approach.<sup>5</sup> The *g*-tensors, energies, main magnetic axis as well as the magnetizations were obtained by SINGLE\_ANISO routine.<sup>6</sup>

### Magnetic Measurements

Magnetic susceptibility measurements were collected using a Quantum Design MPMS, MPMS3 and PPMS VSM magnetometer. Polycrystalline samples were embedded in vaseline to prevent torqueing. Alternating current (ac) magnetic susceptibility data measurements were performed with a 5 and 1.5 Oe oscillating field at frequencies between 0.1 or 1 to 999 or 1488 Hz. All data were corrected for the diamagnetic contribution.

## S2 Crystal Data and Structures

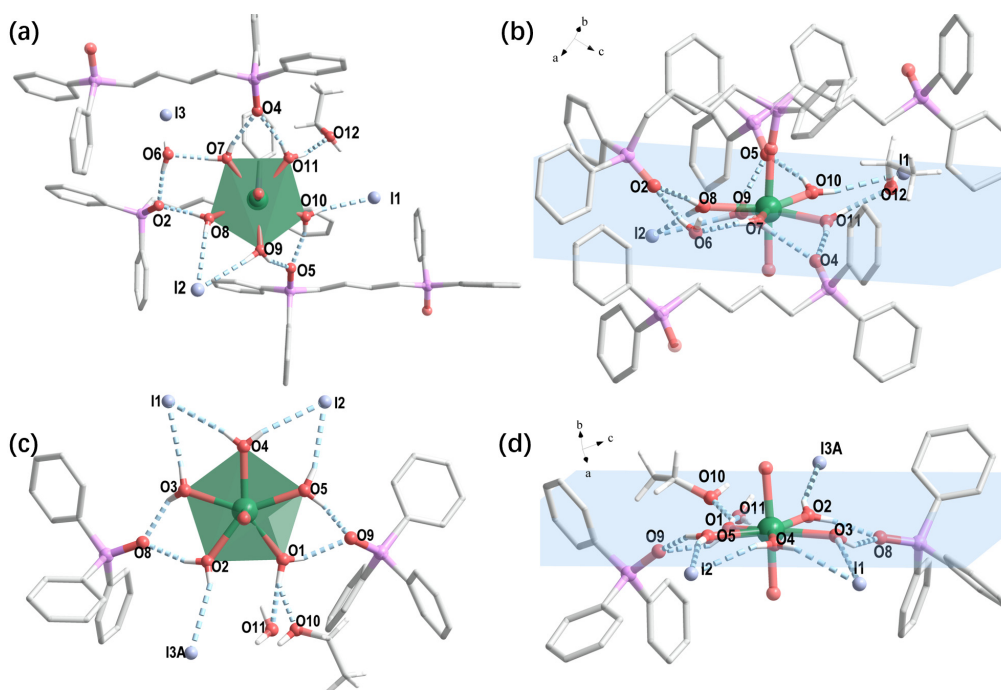

**Fig. S4.** The crystal structures with hydrogen bonds in **1** (a and b) and **2** (c and d). (a) and (c) are the top views of **1** and **2**, respectively. (b) and (d) are side views, where the blue plane is the least-square plane of equatorial-coordinate oxygen atoms. H atoms of the organic ligands and part of the axial-coordinate dppbO<sub>2</sub> ligands are omitted for clarity. Color code: Dy, green; O, red; P, lavender; C, grey; I, bluish violet; H, white.

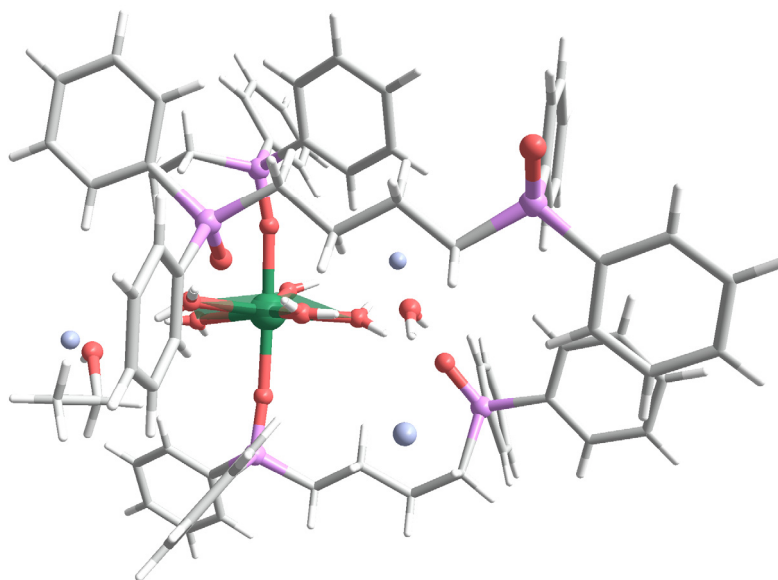

**Fig S5.** The asymmetric unit for **1**. Color code: Dy, green; O, red; P, lavender; C, grey; I, bluish violet; H, white.

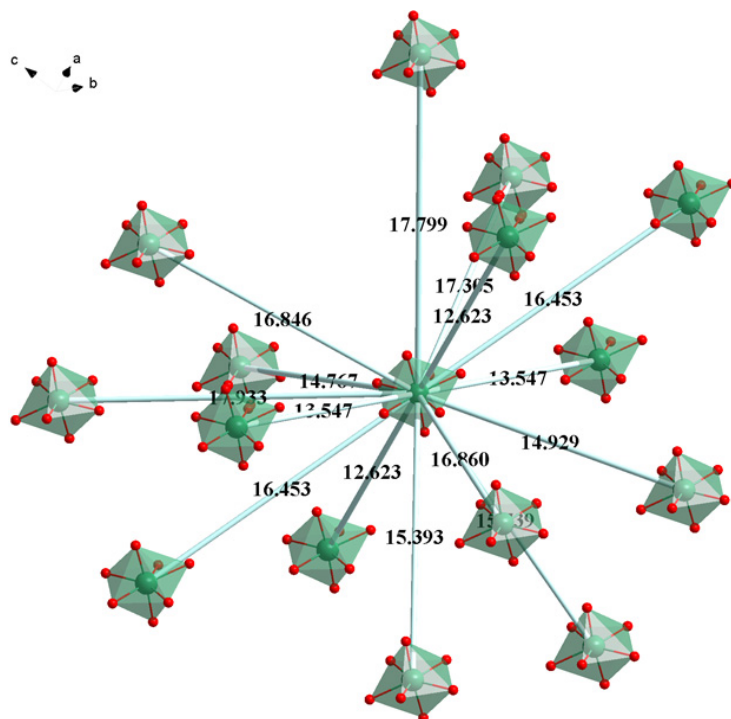

**Fig S6.** Dy-Dy distance between intermolecular for **1** with nearest distance is 12.6227(6) Å.

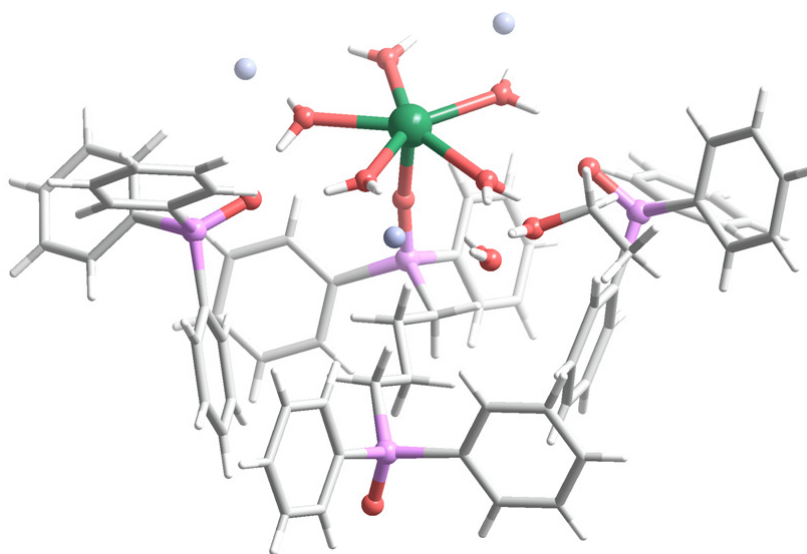

**Fig S7.** The asymmetric unit for **2**. Color code: Dy, green; O, red; P, lavender; C, grey; I, bluish violet; H, white.

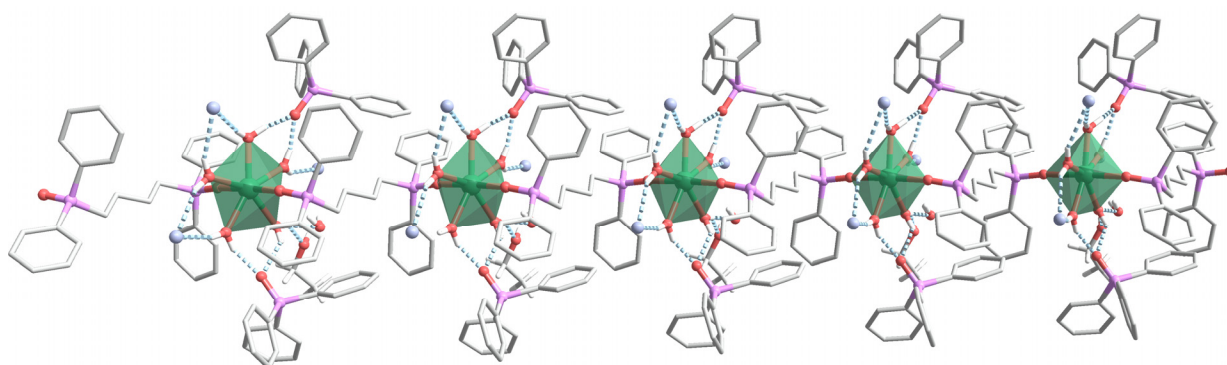

**Fig S8.** Crystal Structure of **2** viewed along the *b* axis. Color code: Dy, green; O, red; P, lavender; C, grey; I, bluish violet; H, white. H atoms of ligand are omitted for clarity.

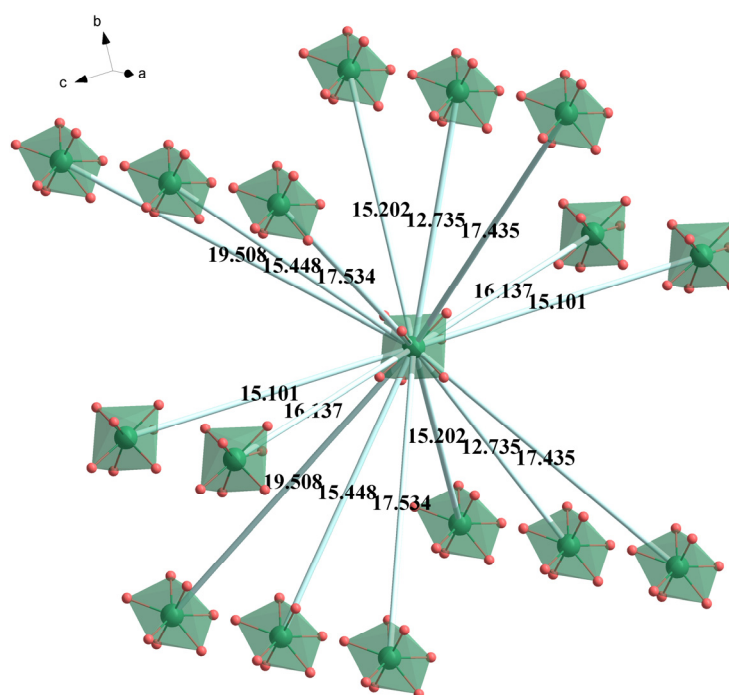

**Fig S9.** Dy-Dy distance between interchain for **2** with nearest distance is 12.7350(8) Å.

**Table S1.** Continuous Shape Measures calculations (CShM) for **1** and **2**.<sup>7</sup>

| Complex  | HP-7<br>( <i>D<sub>7h</sub></i> ) | HPY-7<br>( <i>C<sub>6v</sub></i> ) | HBPY-7<br>( <i>D<sub>5h</sub></i> ) | COC-7<br>( <i>C<sub>3v</sub></i> ) | CTPR-7<br>( <i>C<sub>2v</sub></i> ) | JPBPY-7<br>( <i>D<sub>5h</sub></i> ) | JETPY-7<br>( <i>C<sub>3v</sub></i> ) |
|----------|-----------------------------------|------------------------------------|-------------------------------------|------------------------------------|-------------------------------------|--------------------------------------|--------------------------------------|
| <b>1</b> | 33.97234                          | 23.21739                           | 1.35508                             | 4.19617                            | 2.72181                             | 4.08721                              | 21.55288                             |
| <b>2</b> | 34.07315                          | 25.58438                           | 0.31768                             | 6.65599                            | 5.11064                             | 2.87612                              | 22.89609                             |

HP-7 = Heptagon; HPY-7 = Hexagonal pyramid; PBPY-7 = Pentagonal bipyramid; COC-7 = Capped octahedron; CTPR-7 = Capped trigonal prism; JPBPY-7 = Johnson pentagonal bipyramid J13; JETPY-7 = Johnson elongated triangular pyramid J7.

**Table S2.** Crystal data and structure refinement parameters for **1** and **2**

|                                                               | <b>1</b>                                                                        | <b>2</b>                                                                        |
|---------------------------------------------------------------|---------------------------------------------------------------------------------|---------------------------------------------------------------------------------|
| Empirical formula                                             | C <sub>72</sub> H <sub>88</sub> DyI <sub>3</sub> O <sub>12</sub> P <sub>5</sub> | C <sub>65</sub> H <sub>72</sub> DyI <sub>3</sub> O <sub>10</sub> P <sub>4</sub> |
| Formula weight                                                | 1843.47                                                                         | 1680.30                                                                         |
| Temperature/K                                                 | 120                                                                             | 120                                                                             |
| Crystal system                                                | triclinic                                                                       | monoclinic                                                                      |
| Space group                                                   | <i>P</i> -1                                                                     | <i>P</i> 2 <sub>1</sub>                                                         |
| <i>a</i> /Å                                                   | 12.6227(5)                                                                      | 10.2644(5)                                                                      |
| <i>b</i> /Å                                                   | 13.5467(5)                                                                      | 23.3768(11)                                                                     |
| <i>c</i> /Å                                                   | 23.6777(11)                                                                     | 15.1012(7)                                                                      |
| $\alpha$ /°                                                   | 100.264(2)                                                                      | 90                                                                              |
| $\beta$ /°                                                    | 98.186(2)                                                                       | 103.623(2)                                                                      |
| $\gamma$ /°                                                   | 102.180(2)                                                                      | 90                                                                              |
| Volume/Å <sup>3</sup>                                         | 3825.5(3)                                                                       | 3521.6(3)                                                                       |
| <i>Z</i>                                                      | 2                                                                               | 2                                                                               |
| $\rho_{\text{calc}}$ /g cm <sup>-3</sup>                      | 1.600                                                                           | 1.585                                                                           |
| $\mu$ /mm <sup>-1</sup>                                       | 2.348                                                                           | 2.519                                                                           |
| <i>F</i> (000)                                                | 1832                                                                            | 1654                                                                            |
| Radiation                                                     | Mo- <i>K</i> $\alpha$ ( $\lambda$ = 0.71073)                                    | Mo- <i>K</i> $\alpha$ ( $\lambda$ = 0.71073)                                    |
| Reflections collected                                         | 66147                                                                           | 77697                                                                           |
| Independent reflections                                       | 14046 [ <i>R</i> <sub>int</sub> = 0.0428, <i>R</i> <sub>sigma</sub> = 0.0313]   | 16091 [ <i>R</i> <sub>int</sub> = 0.0451, <i>R</i> <sub>sigma</sub> = 0.0387]   |
| Goodness-of-fit on <i>F</i> <sup>2</sup>                      | 1.023                                                                           | 1.043                                                                           |
| Final <i>R</i> indexes [ <i>I</i> >= 2 $\sigma$ ( <i>I</i> )] | <i>R</i> <sub>1</sub> = 0.0219, <i>wR</i> <sub>2</sub> = 0.0429                 | <i>R</i> <sub>1</sub> = 0.0242, <i>wR</i> <sub>2</sub> = 0.0591                 |
| Final <i>R</i> indexes [all data]                             | <i>R</i> <sub>1</sub> = 0.0319, <i>wR</i> <sub>2</sub> = 0.0455                 | <i>R</i> <sub>1</sub> = 0.0257, <i>wR</i> <sub>2</sub> = 0.0596                 |
| Largest diff. peak/hole/eÅ <sup>-3</sup>                      | 0.38/-0.61                                                                      | 1.79/-0.89                                                                      |
| Flack parameter                                               | -                                                                               | 0.025(7)                                                                        |
| CCDC no.                                                      | 2063601                                                                         | 2063603                                                                         |

$$^a R_1 = \frac{\sum |F_o| - |F_c|}{\sum |F_o|}$$

$$^b wR_2 = \left\{ \frac{\sum w(F_o^2 - F_c^2)^2}{\sum [w(F_o^2)^2]} \right\}^{1/2}$$

**Table S3.** Selected bond lengths [ $\text{\AA}$ ] and angles [ $^\circ$ ] for **1** and **2**.

| Bond lengths |            | Bond lengths       |          | Bond angles |           | Bond angles             |            |
|--------------|------------|--------------------|----------|-------------|-----------|-------------------------|------------|
|              | 1          |                    | 2        |             | 1         |                         | 2          |
| Dy-O1        | 2.2256(16) | Dy-O1              | 2.338(3) | O1-Dy1-O7   | 90.75(6)  | O1-Dy1-O2               | 73.80(12)  |
| Dy-O3        | 2.2163(16) | Dy-O2              | 2.359(3) | O1-Dy1-O8   | 88.69(7)  | O1-Dy1-O3               | 143.95(12) |
| Dy-O7        | 2.3333(18) | Dy-O3              | 2.372(3) | O1-Dy1-O9   | 103.95(7) | O1-Dy1-O4               | 143.31(12) |
| Dy-O8        | 2.3688(19) | Dy-O4              | 2.386(3) | O1-Dy1-O10  | 81.27(7)  | O1-Dy1-O5               | 72.04(12)  |
| Dy-O9        | 2.3462(19) | Dy-O5              | 2.360(3) | O1-Dy1-O11  | 94.35(7)  | O2-Dy1-O3               | 71.88(12)  |
| Dy-O10       | 2.3693(19) | Dy-O6              | 2.210(3) | O3-Dy1-O1   | 174.74(6) | O2-Dy1-O4               | 142.75(12) |
| Dy-O11       | 2.3538(19) | Dy-O7 <sup>1</sup> | 2.222(3) | O3-Dy1-O7   | 85.47(6)  | O2-Dy1-O5               | 145.04(12) |
|              |            |                    |          | O3-Dy1-O8   | 93.79(7)  | O3-Dy1-O4               | 71.14(12)  |
|              |            |                    |          | O3-Dy1-O9   | 81.23(7)  | O5-Dy1-O3               | 143.07(12) |
|              |            |                    |          | O3-Dy1-O10  | 99.86(7)  | O5-Dy1-O4               | 71.98(12)  |
|              |            |                    |          | O3-Dy1-O11  | 81.12(7)  | O6-Dy1-O1               | 86.04(13)  |
|              |            |                    |          | O7-Dy1-O8   | 74.27(7)  | O6-Dy1-O2               | 94.40(12)  |
|              |            |                    |          | O7-Dy1-O9   | 143.35(7) | O6-Dy1-O3               | 85.89(12)  |
|              |            |                    |          | O7-Dy1-O10  | 145.93(7) | O6-Dy1-O4               | 87.30(13)  |
|              |            |                    |          | O7-Dy1-O11  | 74.51(7)  | O6-Dy1-O5               | 90.48(13)  |
|              |            |                    |          | O8-Dy1-O10  | 137.95(7) | O6-Dy1-O7 <sup>1</sup>  | 177.75(14) |
|              |            |                    |          | O9-Dy1-O8   | 72.74(7)  | O7 <sup>1</sup> -Dy1-O1 | 93.36(13)  |
|              |            |                    |          | O9-Dy1-O10  | 70.39(7)  | O7 <sup>1</sup> -Dy1-O2 | 87.51(12)  |
|              |            |                    |          | O9-Dy1-O11  | 135.75(7) | O7 <sup>1</sup> -Dy1-O3 | 95.84(12)  |
|              |            |                    |          | O11-Dy1-O8  | 148.66(7) | O7 <sup>1</sup> -Dy1-O4 | 91.90(12)  |
|              |            |                    |          | O11-Dy1-O10 | 73.17(7)  | O7 <sup>1</sup> -Dy1-O5 | 87.28(13)  |

<sup>1</sup>-1+x,+y,+z



### S3 Magnetic Characterization

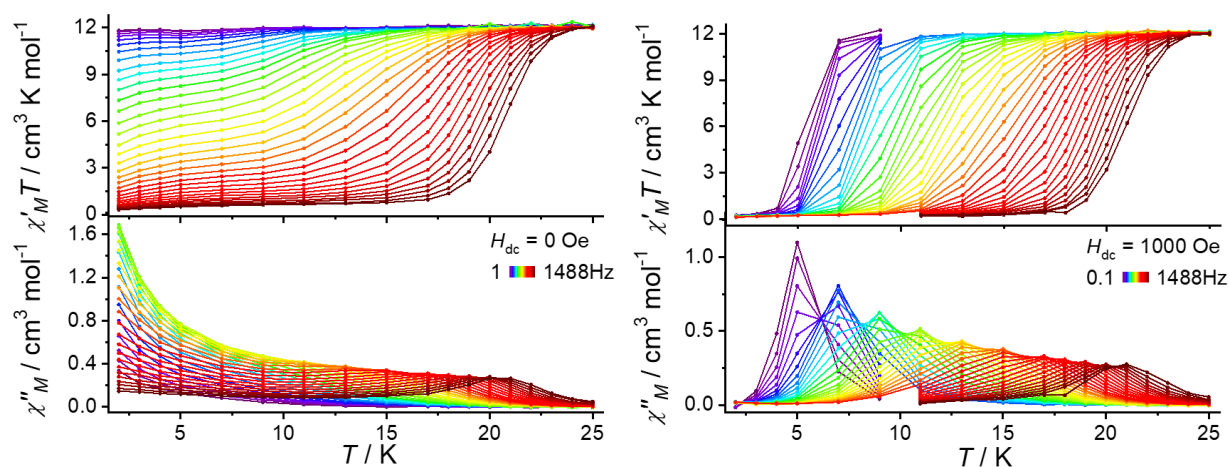

**Fig S10.** Temperature dependence of the in-phase ( $\chi'_M T$ ) and out-of-phase ( $\chi_M''$ ) components of the ac magnetic susceptibility for **1** under 0 (*left*) and 1000 Oe (*right*) applied dc field with the ac frequency of 1-1488 and 0.1-1488 Hz as shown in the figure. Solid lines are guides to the eyes.

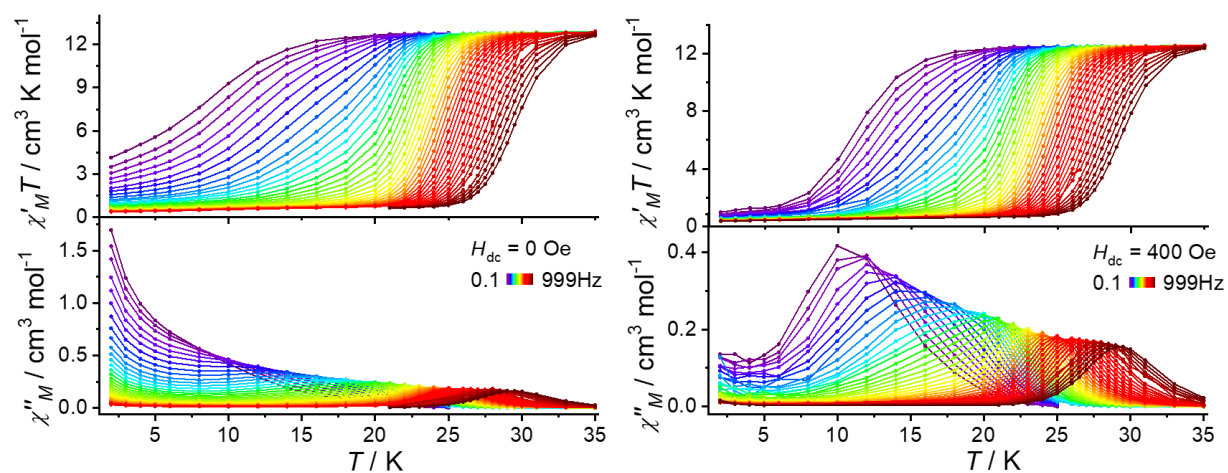

**Fig S11.** Temperature dependence of the in-phase ( $\chi'_M T$ ) and out-of-phase ( $\chi_M''$ ) components of the ac magnetic susceptibility for **2** under 0 (*left*) and 400 Oe (*right*) applied dc field with the ac frequency of 0.1-999 Hz. Solid lines are guides to the eyes.

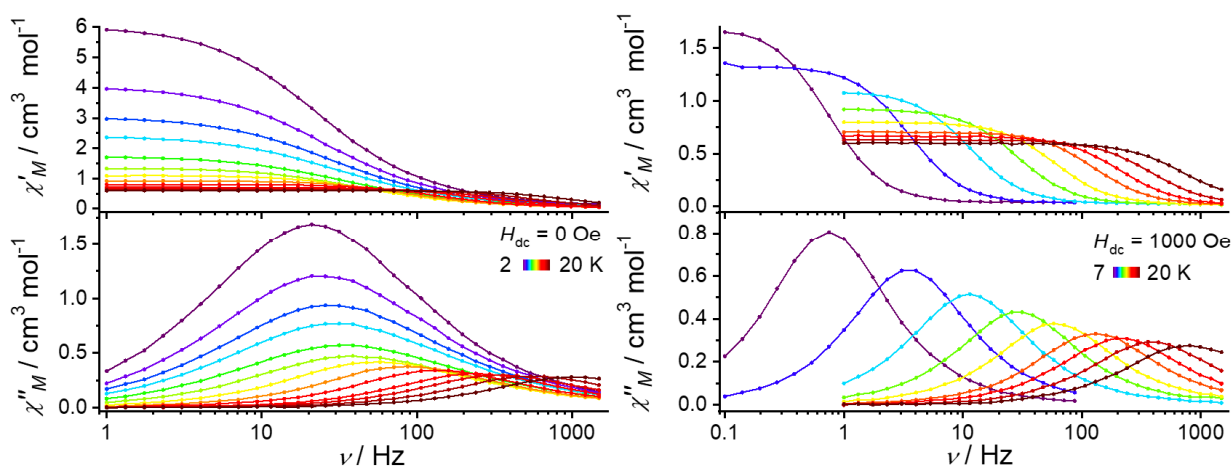

**Fig S12.** Frequency dependence in 0 and 1000 Oe dc field for **1**. Solid lines are guides to the eyes.

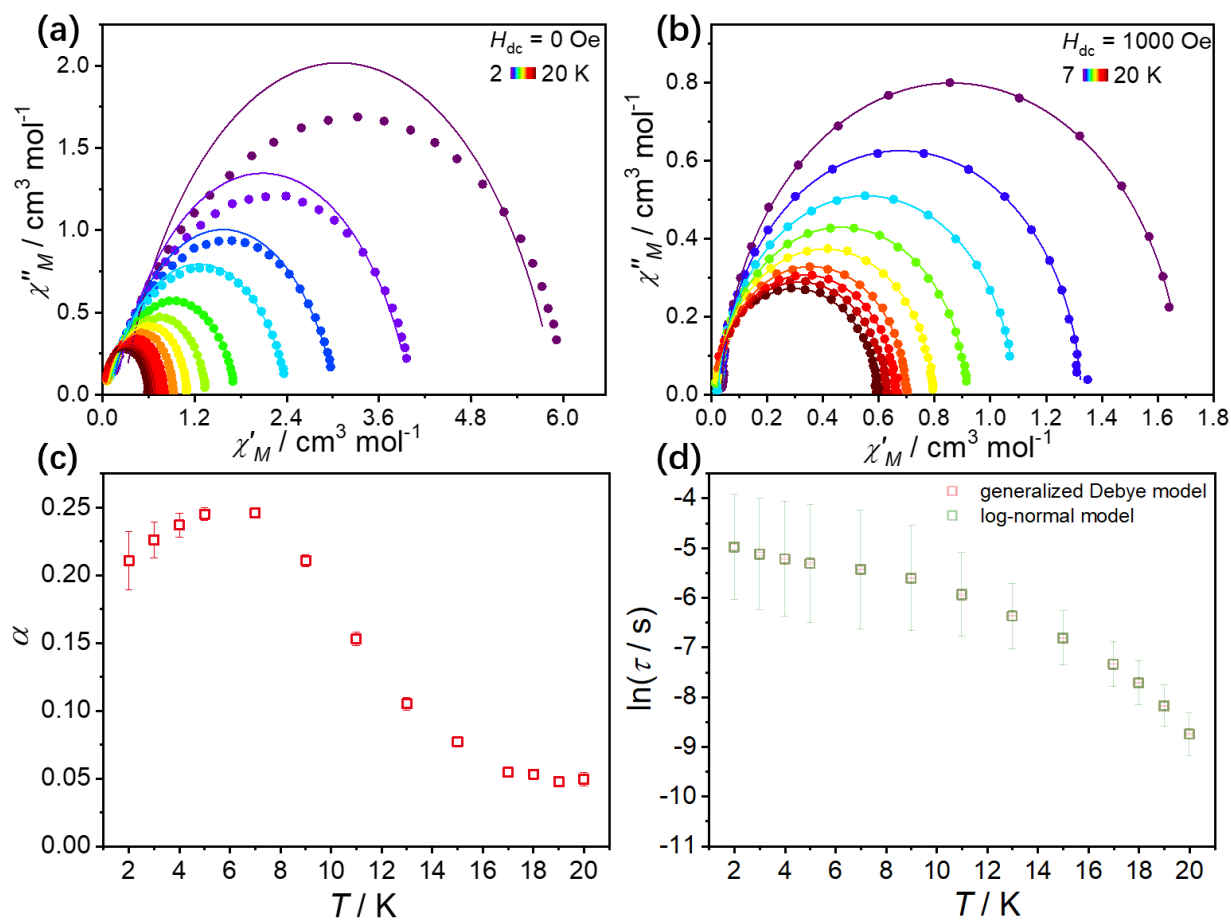

**Fig S13.** Cole–Cole plots of **1** at (a) 2–23 K under zero dc field and (b) 7–23 K under 1000 Oe dc field. Solid lines are best fits for the generalized Debye model. (c)  $\alpha$  values obtained from the ac data under zero dc field with the generalized Debye model. (d) The relaxation times and their errors obtained from the ac data under zero dc field with the generalized Debye model (red) and the log-normal model (green).

**Table S4.** The fitting parameters of ac susceptibilities derived from the generalized Debye model for **1**

|                       | $T$ (K) | $\tau$ (s)            | error (s)             | $\chi_0$ (cm <sup>3</sup> mol <sup>-1</sup> ) | $\chi_\infty$ (cm <sup>3</sup> mol <sup>-1</sup> ) | $\alpha$ | error   |
|-----------------------|---------|-----------------------|-----------------------|-----------------------------------------------|----------------------------------------------------|----------|---------|
| <b>1</b><br>(0 Oe)    | 2       | 0.00686               | $3.16 \times 10^{-4}$ | 5.90937                                       | 0.25781                                            | 0.21084  | 0.02146 |
|                       | 3       | 0.00596               | $1.74 \times 10^{-4}$ | 4.02241                                       | 0.15228                                            | 0.22624  | 0.01334 |
|                       | 4       | 0.00541               | $1.05 \times 10^{-4}$ | 3.04139                                       | 0.10174                                            | 0.23717  | 0.00877 |
|                       | 5       | 0.00491               | $5.35 \times 10^{-5}$ | 2.43182                                       | 0.07446                                            | 0.24515  | 0.00487 |
|                       | 7       | 0.00437               | $3.24 \times 10^{-5}$ | 1.75906                                       | 0.0503                                             | 0.24604  | 0.00333 |
|                       | 9       | 0.00366               | $3.43 \times 10^{-5}$ | 1.37226                                       | 0.04865                                            | 0.21086  | 0.00448 |
|                       | 11      | 0.00263               | $2.54 \times 10^{-5}$ | 1.1156                                        | 0.04844                                            | 0.15318  | 0.00508 |
|                       | 13      | 0.00171               | $1.39 \times 10^{-5}$ | 0.93076                                       | 0.04311                                            | 0.10512  | 0.0046  |
|                       | 15      | 0.0011                | $7.19 \times 10^{-6}$ | 0.80496                                       | 0.03389                                            | 0.07721  | 0.00383 |
|                       | 17      | $6.49 \times 10^{-4}$ | $3.27 \times 10^{-6}$ | 0.70906                                       | 0.0281                                             | 0.05456  | 0.00298 |
|                       | 18      | $4.45 \times 10^{-4}$ | $2.48 \times 10^{-6}$ | 0.66815                                       | 0.02003                                            | 0.05317  | 0.00316 |
|                       | 19      | $2.81 \times 10^{-4}$ | $1.51 \times 10^{-6}$ | 0.63325                                       | 0.01292                                            | 0.04746  | 0.00277 |
|                       | 20      | $1.59 \times 10^{-4}$ | $2.02 \times 10^{-6}$ | 0.60164                                       | 0.(0055)                                           | 0.04957  | 0.00504 |
| <b>1</b><br>(1000 Oe) | 7       | 0.2143                | $3.71 \times 10^{-4}$ | 1.69915                                       | 0.03798                                            | 0.01928  | 0.00105 |
|                       | 9       | 0.04532               | $1.52 \times 10^{-4}$ | 1.33439                                       | 0.03056                                            | 0.02088  | 0.00213 |
|                       | 11      | 0.01407               | $2.68 \times 10^{-5}$ | 1.09329                                       | 0.0243                                             | 0.02456  | 0.00115 |
|                       | 13      | 0.00551               | $1.81 \times 10^{-5}$ | 0.92081                                       | 0.01956                                            | 0.02556  | 0.00207 |
|                       | 15      | 0.00266               | $6.41 \times 10^{-6}$ | 0.79974                                       | 0.01717                                            | 0.02417  | 0.00153 |
|                       | 17      | 0.00122               | $3.93 \times 10^{-6}$ | 0.70606                                       | 0.01469                                            | 0.02624  | 0.00203 |
|                       | 18      | $7.46 \times 10^{-4}$ | $2.66 \times 10^{-6}$ | 0.66817                                       | 0.00987                                            | 0.03917  | 0.0022  |
|                       | 19      | $4.10 \times 10^{-4}$ | $1.73 \times 10^{-6}$ | 0.63315                                       | 0.00675                                            | 0.04556  | 0.0024  |
|                       | 20      | $2.05 \times 10^{-4}$ | $2.20 \times 10^{-6}$ | 0.60215                                       | 0.(0045)                                           | 0.05862  | 0.00474 |

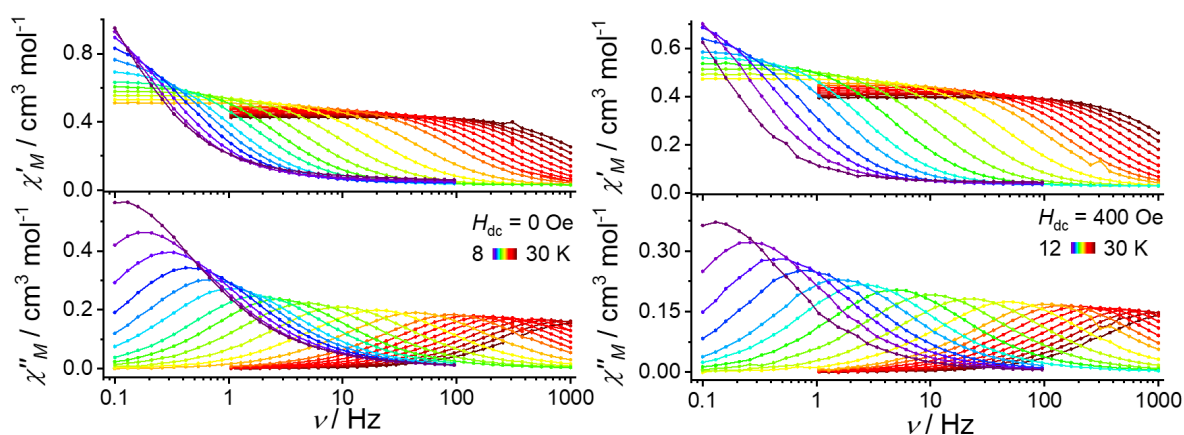

**Fig S14.** Frequency dependence in 0 and 400 Oe dc field for **2**. Solid lines are guides to the eyes.

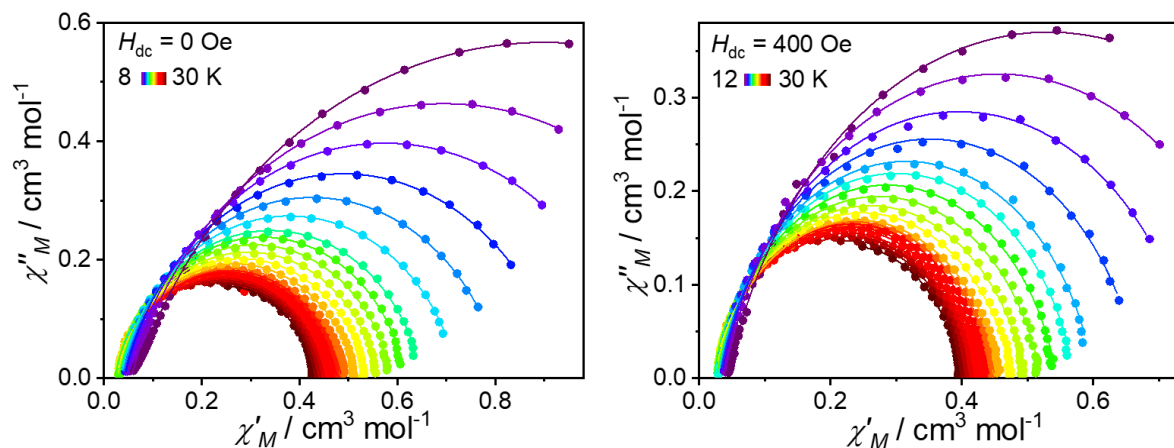

**Fig S15.** Cole–Cole plots of **2** at 8–30 K under zero dc field (*left*) and 12–30 K under 400 Oe dc field (*right*). Solid lines are best fits for the generalized Debye model.

**Table S5.** The fitting parameters of ac susceptibilities derived from the generalized Debye model for **2**

|                      | $T$ (K)               | $\tau$ (s)            | error (s)             | $\chi_0$ (cm <sup>3</sup> mol <sup>-1</sup> ) | $\chi_\infty$ (cm <sup>3</sup> mol <sup>-1</sup> ) | $\alpha$ | error   |
|----------------------|-----------------------|-----------------------|-----------------------|-----------------------------------------------|----------------------------------------------------|----------|---------|
| <b>2</b><br>(0 Oe)   | 10                    | 0.85963               | 0.00543               | 1.40891                                       | 0.05806                                            | 0.20283  | 0.0018  |
|                      | 12                    | 0.53426               | 0.00191               | 1.16066                                       | 0.0506                                             | 0.17783  | 0.00132 |
|                      | 14                    | 0.34081               | 0.00095               | 0.98724                                       | 0.0441                                             | 0.16359  | 0.00121 |
|                      | 16                    | 0.22371               | $7.32 \times 10^{-4}$ | 0.85962                                       | 0.03936                                            | 0.1535   | 0.00156 |
|                      | 18                    | 0.14864               | $5.25 \times 10^{-4}$ | 0.76327                                       | 0.03606                                            | 0.14563  | 0.0018  |
|                      | 20                    | 0.0859                | 0.000404              | 0.68524                                       | 0.03375                                            | 0.13575  | 0.00252 |
|                      | 21                    | 0.05579               | $2.44 \times 10^{-4}$ | 0.65025                                       | 0.03247                                            | 0.13141  | 0.00222 |
|                      | 22                    | 0.03178               | $1.29 \times 10^{-4}$ | 0.61956                                       | 0.03071                                            | 0.1362   | 0.00206 |
|                      | 23                    | 0.01618               | $7.15 \times 10^{-5}$ | 0.5917                                        | 0.02875                                            | 0.14356  | 0.00223 |
|                      | 24                    | 0.00772               | $3.79 \times 10^{-5}$ | 0.56548                                       | 0.02664                                            | 0.14945  | 0.00246 |
|                      | 25                    | 0.00361               | $1.76 \times 10^{-5}$ | 0.54264                                       | 0.0238                                             | 0.15433  | 0.0024  |
|                      | 26                    | 0.00174               | $8.19 \times 10^{-6}$ | 0.5232                                        | 0.02368                                            | 0.15562  | 0.00241 |
|                      | 26.5                  | 0.00122               | $6.28 \times 10^{-6}$ | 0.5125                                        | 0.02437                                            | 0.152    | 0.00263 |
|                      | 27                    | $8.57 \times 10^{-4}$ | $4.32 \times 10^{-6}$ | 0.50283                                       | 0.02412                                            | 0.15054  | 0.00241 |
|                      | 27.5                  | $6.17 \times 10^{-4}$ | $3.46 \times 10^{-6}$ | 0.4933                                        | 0.02676                                            | 0.14486  | 0.00253 |
|                      | 28                    | $4.65 \times 10^{-4}$ | $1.11 \times 10^{-5}$ | 0.48398                                       | 0.03331                                            | 0.13466  | 0.01006 |
|                      | 28.5                  | $3.33 \times 10^{-4}$ | $2.66 \times 10^{-6}$ | 0.47528                                       | 0.03623                                            | 0.13035  | 0.00303 |
| 29                   | $2.52 \times 10^{-4}$ | $2.49 \times 10^{-6}$ | 0.46694               | 0.04378                                       | 0.12245                                            | 0.00333  |         |
| 29.5                 | $1.93 \times 10^{-4}$ | $2.56 \times 10^{-6}$ | 0.45879               | 0.05291                                       | 0.11366                                            | 0.00395  |         |
| 30                   | $1.56 \times 10^{-4}$ | $2.22 \times 10^{-6}$ | 0.45082               | 0.07206                                       | 0.09309                                            | 0.00396  |         |
| <b>2</b><br>(400 Oe) | 10                    | 3.09819               | 0.13733               | 1.35053                                       | 0.05335                                            | 0.21584  | 0.00611 |
|                      | 12                    | 1.1749                | 0.01698               | 1.07571                                       | 0.04606                                            | 0.17454  | 0.00383 |
|                      | 14                    | 0.58396               | 0.00301               | 0.92031                                       | 0.04024                                            | 0.15744  | 0.00195 |
|                      | 16                    | 0.32385               | 0.00174               | 0.80008                                       | 0.03571                                            | 0.15203  | 0.00241 |

|      |                       |                       |         |         |         |         |
|------|-----------------------|-----------------------|---------|---------|---------|---------|
| 18   | 0.18831               | 0.00102               | 0.70796 | 0.03308 | 0.14205 | 0.0027  |
| 20   | 0.09567               | $5.01 \times 10^{-4}$ | 0.63346 | 0.03149 | 0.13181 | 0.00281 |
| 21   | 0.05844               | $2.30 \times 10^{-4}$ | 0.60213 | 0.03012 | 0.13558 | 0.00199 |
| 22   | 0.03129               | $1.49 \times 10^{-4}$ | 0.57377 | 0.02868 | 0.14219 | 0.00241 |
| 23   | 0.01517               | $7.70 \times 10^{-5}$ | 0.5483  | 0.02654 | 0.15258 | 0.00253 |
| 24   | 0.00699               | $3.54 \times 10^{-5}$ | 0.52365 | 0.02428 | 0.15782 | 0.0025  |
| 25   | 0.00323               | $1.70 \times 10^{-5}$ | 0.50285 | 0.02221 | 0.16066 | 0.00256 |
| 26   | 0.00156               | $1.95 \times 10^{-5}$ | 0.48515 | 0.02404 | 0.16224 | 0.00628 |
| 26.5 | 0.00108               | $5.61 \times 10^{-6}$ | 0.47512 | 0.02211 | 0.15819 | 0.00253 |
| 27   | $7.62 \times 10^{-4}$ | $4.53 \times 10^{-6}$ | 0.46619 | 0.02225 | 0.15482 | 0.00275 |
| 27.5 | $5.51 \times 10^{-4}$ | $3.68 \times 10^{-6}$ | 0.45719 | 0.02607 | 0.14802 | 0.0029  |
| 28   | $4.07 \times 10^{-4}$ | $4.41 \times 10^{-6}$ | 0.44876 | 0.03096 | 0.13821 | 0.00437 |
| 28.5 | $3.01 \times 10^{-4}$ | $2.98 \times 10^{-6}$ | 0.44057 | 0.03699 | 0.13275 | 0.00355 |
| 29   | $2.30 \times 10^{-4}$ | $2.79 \times 10^{-6}$ | 0.43269 | 0.04604 | 0.12147 | 0.00391 |
| 29.5 | $1.82 \times 10^{-4}$ | $3.44 \times 10^{-6}$ | 0.42526 | 0.05931 | 0.10593 | 0.00552 |
| 30   | $1.43 \times 10^{-4}$ | $2.87 \times 10^{-6}$ | 0.41805 | 0.07158 | 0.09812 | 0.00511 |

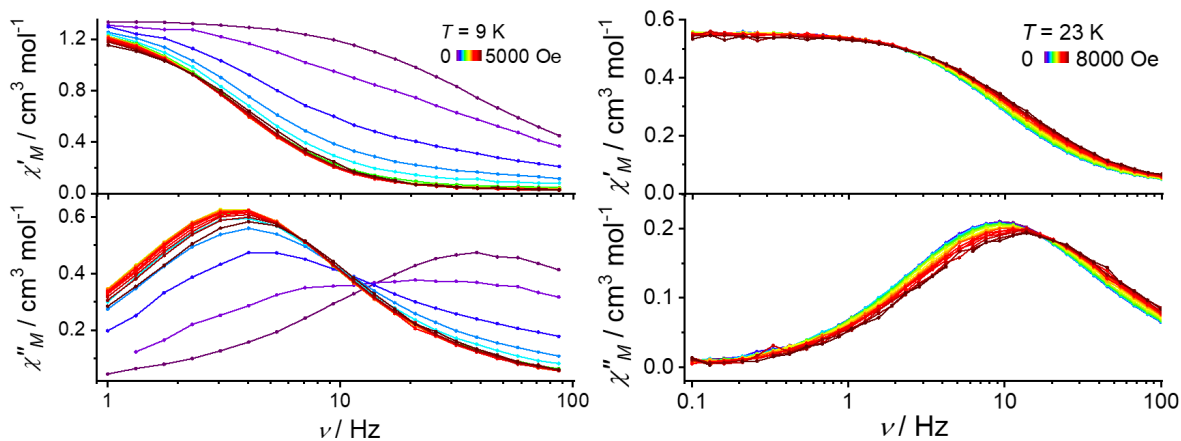

**Fig S16.** Field dependence of the alternating-current molar magnetic susceptibilities for **1** at 9 K (*left*) and **2** at 23 K (*right*), respectively. Solid lines are guides to the eyes.

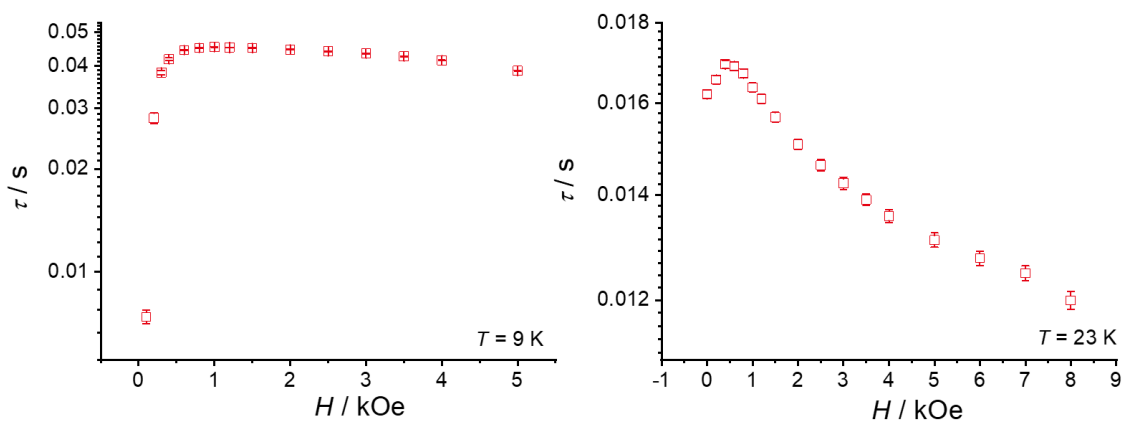

**Fig S17.** Field dependence of the relaxation time for **1** (*left*) and **2** (*right*).

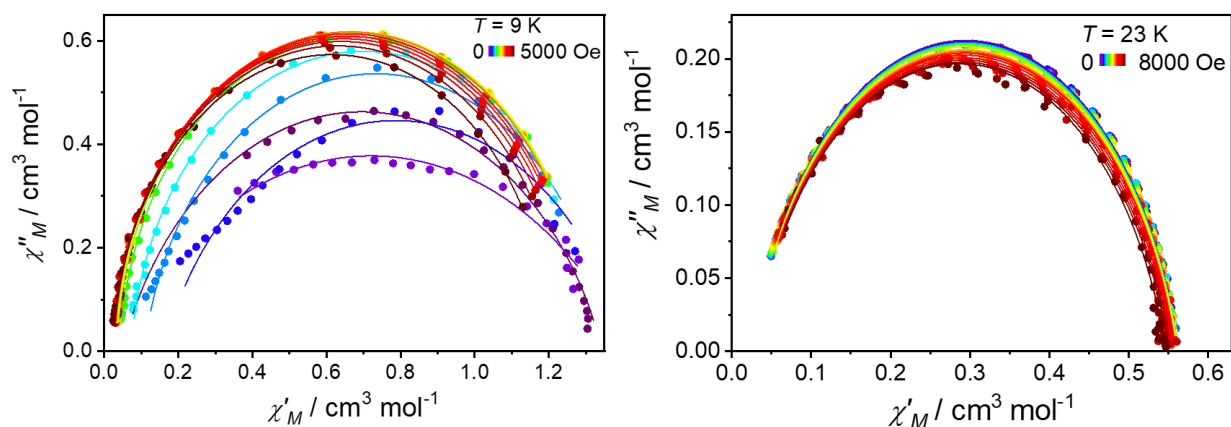

**Fig S18.** Cole-Cole plots of **1** (left) at 9 K under 0-5000 Oe dc field and **2** (right) at 23 K under 0-8000 Oe dc field, and solid lines are best fits for the generalized Debye model.

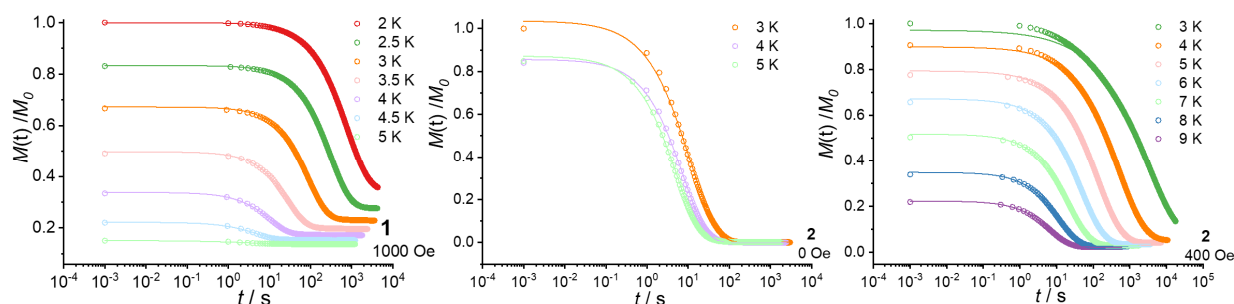

**Fig S19.** DC magnetization decay of **1** and **2** with final field as shown. The magnetic field was ramped to 2 T for **1** and 3 T for **2** and then the temperature was declined to the indicated temperature. After temperature and magnetic moment are steady, the magnetic field was started to reach 1000 Oe for **1**, 0 and 400 Oe for **2**, and kept unchanged for at least  $10^3 \sim 10^4$  s depending on the measured temperature. During the procedure, the magnetization kept measuring. The solid lines are the best fit to the exponential decay as  $M(t) = M_f + (M_i - M_f) \exp[-(t/\tau)^\beta]$ , where  $\tau$  is the relaxation time.

**Table S6.** The fitting parameters of dc magnetization decay derived from  $M(t) = M_f + (M_i - M_f) \exp[-(t/\tau)^\beta]$  for **1** with final field of 1000 Oe and **2** with final field of 0 and 400 Oe, respectively.

|                       | T (K) | $M_f$ (emu)              | $M_i$ (emu) | $\tau$ (s) | error (s) | $\beta$ | error                    |
|-----------------------|-------|--------------------------|-------------|------------|-----------|---------|--------------------------|
| <b>1</b><br>(1000 Oe) | 2     | 0.0559                   | 0.16149     | 791.96194  | 0.08529   | 0.82671 | $1.20125 \times 10^{-4}$ |
|                       | 2.5   | 0.04467                  | 0.13458     | 308.73248  | 0.08181   | 0.89268 | $2.40463 \times 10^{-4}$ |
|                       | 3     | 0.03708                  | 0.1086      | 88.97777   | 0.09574   | 0.91257 | $9.73445 \times 10^{-4}$ |
|                       | 3.5   | 0.03168                  | 0.08033     | 28.23852   | 0.07129   | 0.91123 | 0.00228                  |
|                       | 4     | 0.02769                  | 0.05447     | 10.65093   | 0.04486   | 0.88009 | 0.0036                   |
|                       | 4.5   | 0.0246                   | 0.0358      | 4.95725    | 0.039     | 0.82818 | 0.00613                  |
| <b>2</b><br>(0 Oe)    | 3     | $3.35645 \times 10^{-5}$ | 0.04104     | 11.24995   | 0.02364   | 0.69221 | $9.96993 \times 10^{-4}$ |
|                       | 4     | $1.83643 \times 10^{-5}$ | 0.03394     | 7.42866    | 0.0126    | 0.76638 | 0.00106                  |

|                      |   |                          |         |            |         |         |                          |
|----------------------|---|--------------------------|---------|------------|---------|---------|--------------------------|
| <b>2</b><br>(400 Oe) | 5 | $8.22918 \times 10^{-5}$ | 0.03455 | 5.11584    | 0.00917 | 0.75801 | 0.00107                  |
|                      | 3 | 0.00441                  | 0.09812 | 3145.30655 | 2.05749 | 0.4855  | $3.33245 \times 10^{-4}$ |
|                      | 4 | 0.00532                  | 0.09077 | 493.00595  | 0.1003  | 0.60324 | $7.65741 \times 10^{-5}$ |
|                      | 5 | 0.0043                   | 0.08017 | 135.30055  | 0.02988 | 0.66398 | $9.10725 \times 10^{-5}$ |
|                      | 6 | 0.00358                  | 0.06792 | 48.68896   | 0.02032 | 0.70439 | $1.97618 \times 10^{-4}$ |
|                      | 7 | 0.00307                  | 0.05233 | 21.84279   | 0.01289 | 0.74151 | $3.16805 \times 10^{-4}$ |
|                      | 8 | 0.00269                  | 0.03522 | 11.74531   | 0.01216 | 0.78361 | $6.44242 \times 10^{-4}$ |
|                      | 9 | 0.00238                  | 0.02258 | 6.83429    | 0.00814 | 0.80736 | $8.09933 \times 10^{-4}$ |

## S4 Photoluminescence Spectra

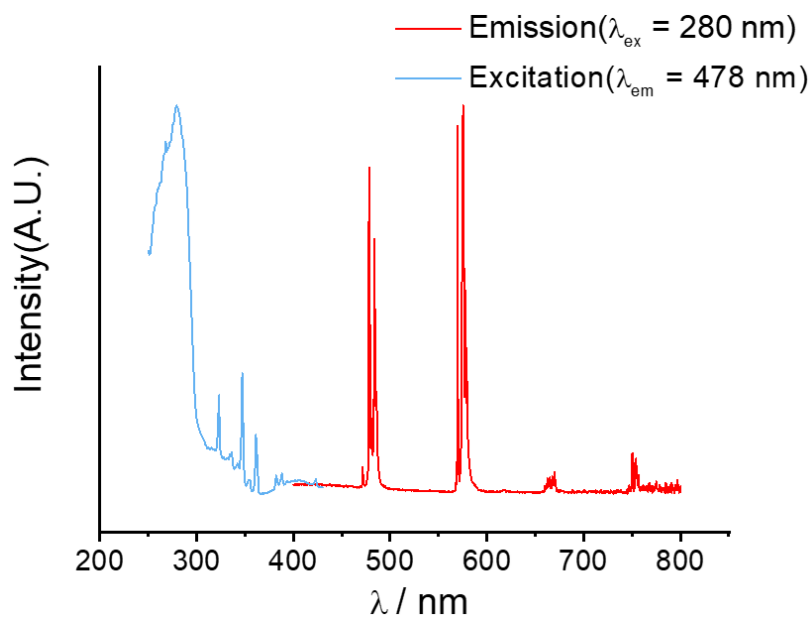

Fig S20. Photoluminescence spectra for **1** at 6 K.

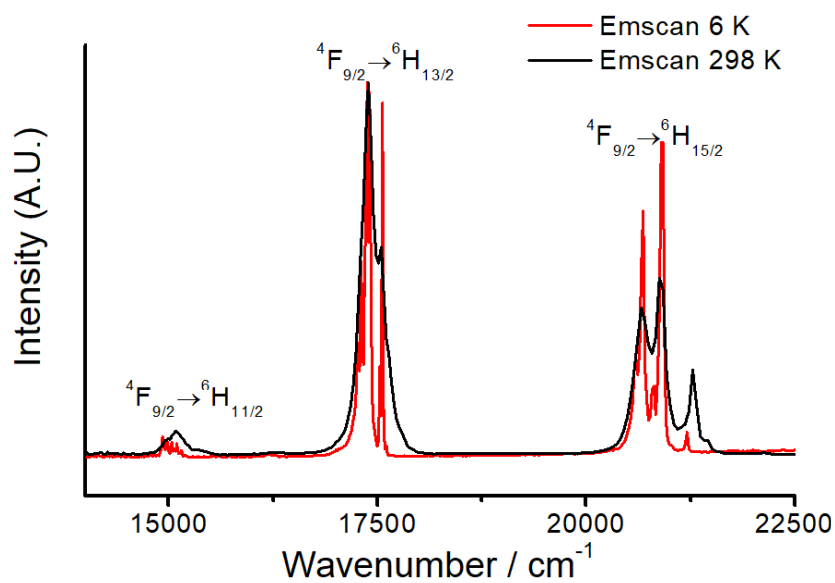

Fig S21. The emission spectra were measured at 298 K ( $\lambda_{\text{ex}} = 292 \text{ nm}$ ) and 6 K ( $\lambda_{\text{ex}} = 280 \text{ nm}$ ) for **1**.



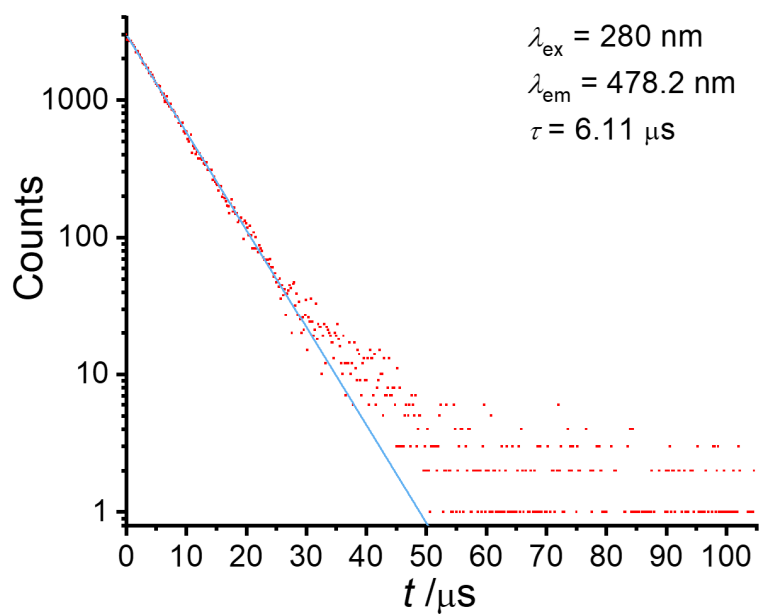

**Fig S22.** Lifetime measurements were collected at 6 K with mean lifetime  $\tau = 6.11(1) \text{ } \mu\text{s}$  (by first order exponential fits) for **1**.

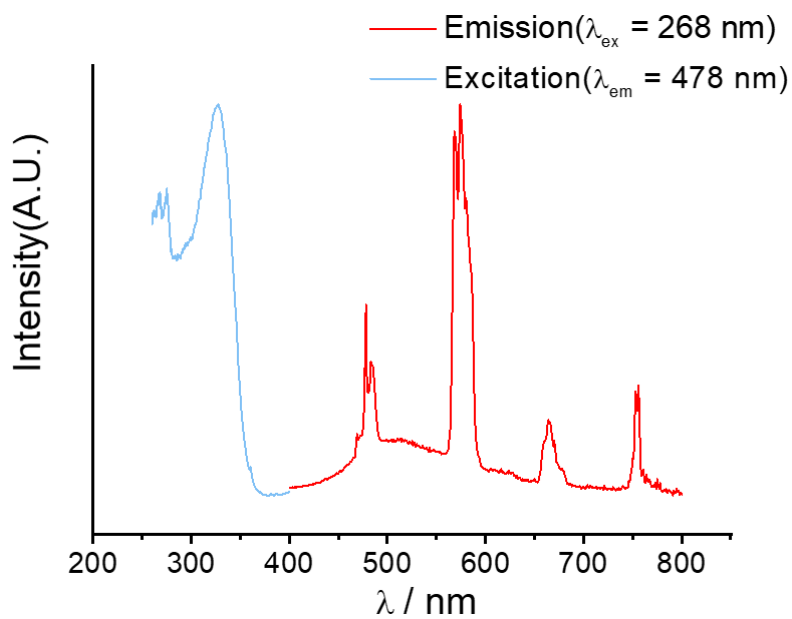

**Fig S23.** Photoluminescence spectra for **2** at 11 K.

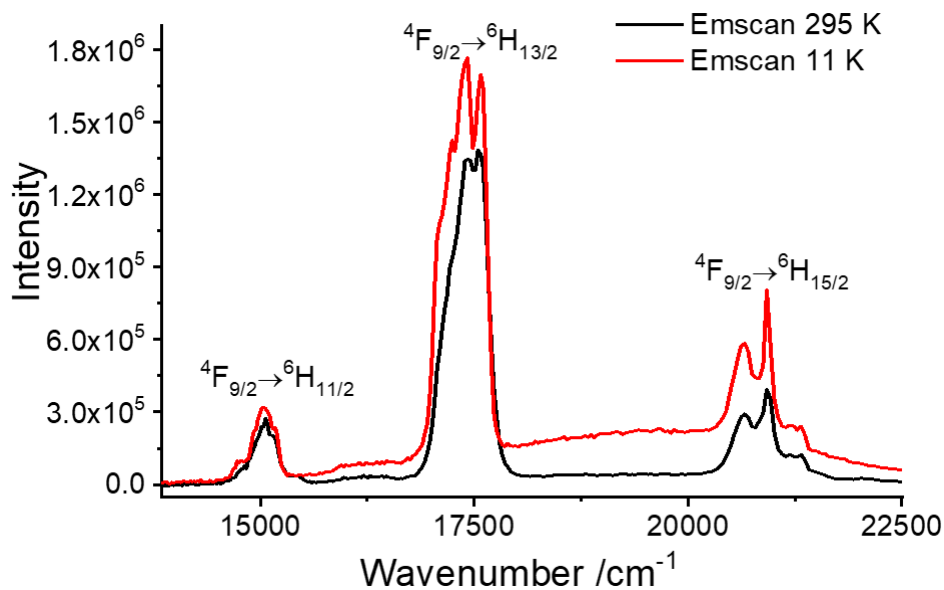

**Fig S24.** The emission spectra were measured at 295 K and 11 K when  $\lambda_{\text{ex}} = 276$  nm for **2**.

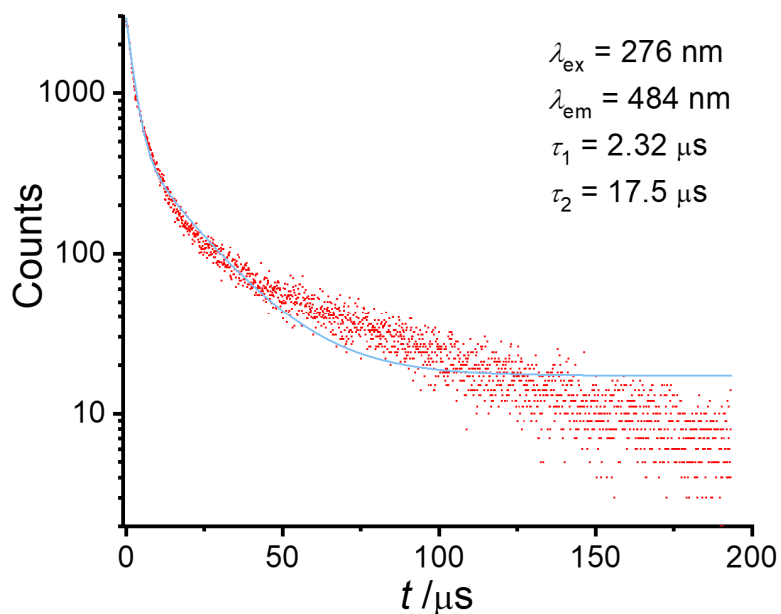

**Fig S25.** Lifetime measurements were collected at 10 K with mean lifetime  $\tau_1 = 2.32(2)$ ,  $\tau_2 = 17.5(3)$   $\mu\text{s}$  (by second order exponential fits) for **2**.

## S5 *Ab initio* Calculations

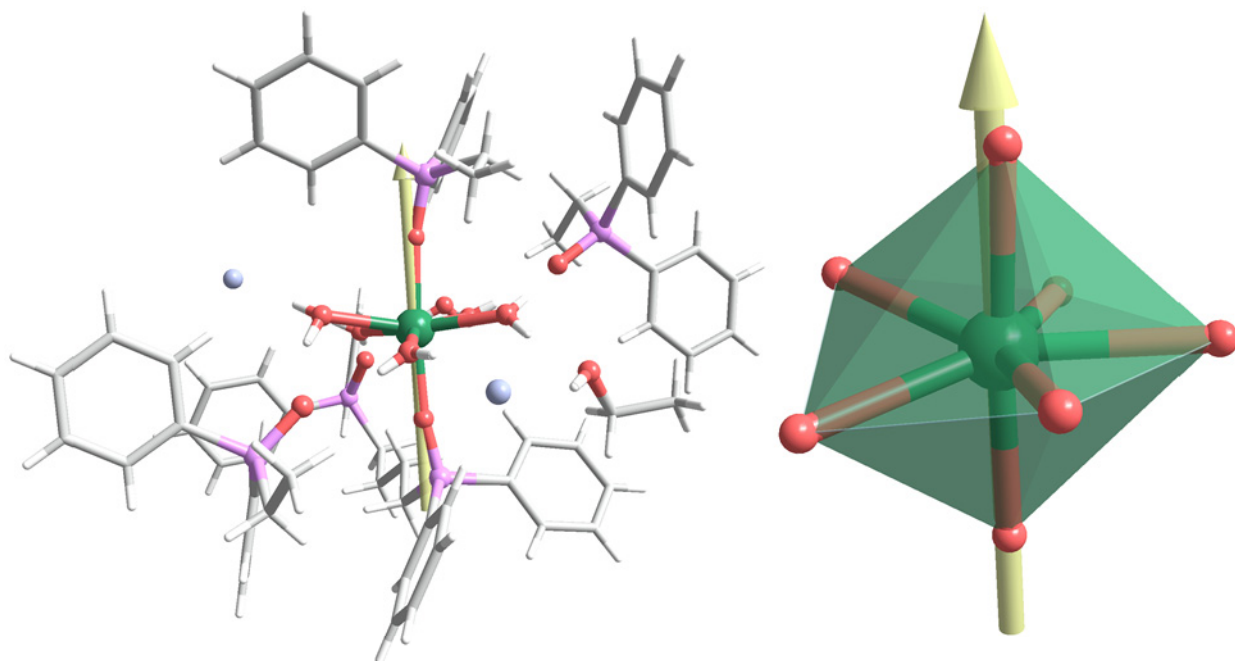

**Fig S26.** The fragment of single-crystal structure of **1** used for the *ab initio* calculations (*left*), where the main magnetic axis of the ground Kramers doublet (yellow arrow) is virtually along the pair of phosphine oxide ligand oxygen atoms. The central Dy displays pentagonal bipyramid geometry with the orientation of the main magnetic axis (*right*).

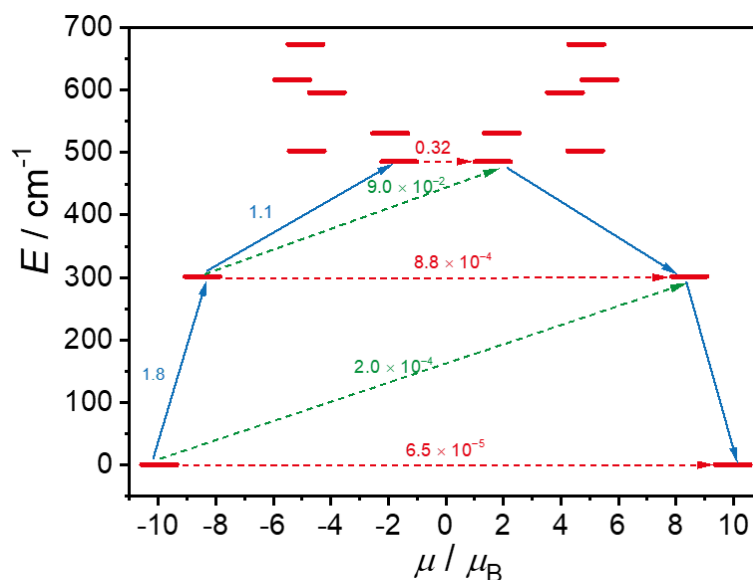

**Fig S27.** Magnetization blocking barriers for dimer **1**. The lowest 16 spin-orbit states are arranged according to the magnitude of their magnetic moments on the horizontal axis. The numbers next to arrows connecting two states display the average transition magnetic moment matrix element between the respective states.

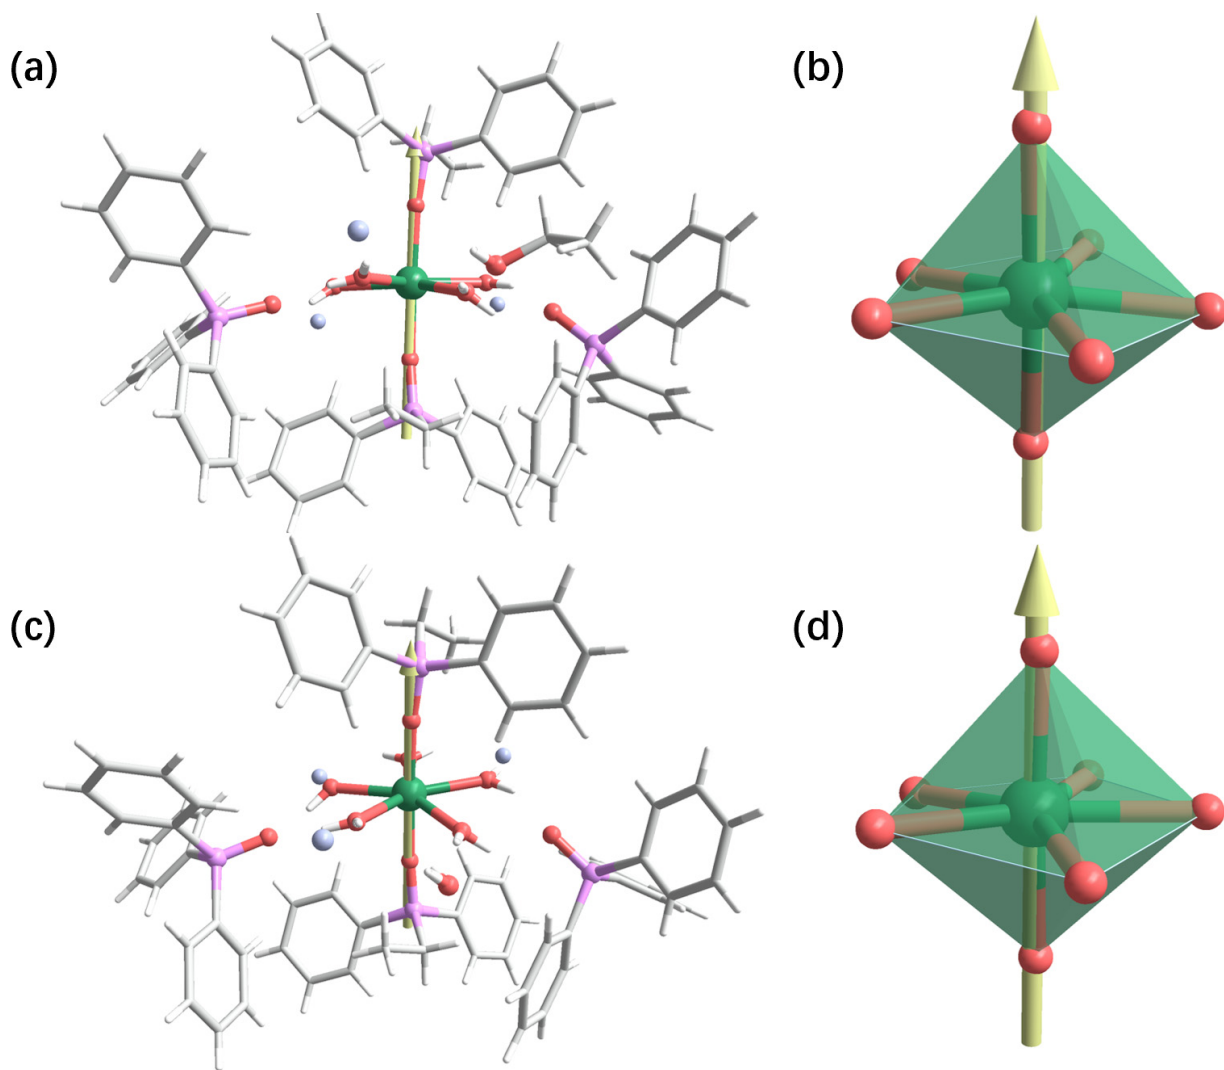

**Fig S28.** The fragment of single-crystal structure of **2** used for the model A1 (a) and A2 (c) *ab initio* calculations, where the main magnetic axis of the ground Kramers doublet (yellow arrow) is virtually along the pair of phosphine oxide ligand' oxygen atoms. The central Dy displays pentagonal bipyramid geometry with the orientation of the main magnetic axis for model A1 (b) and A2 (d), respectively.

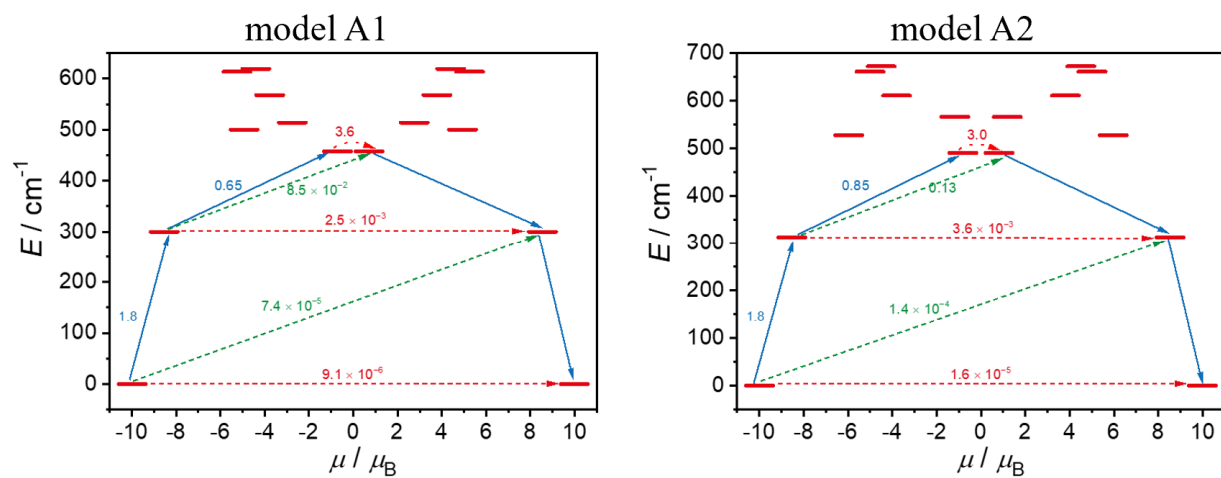

**Fig S29.** Magnetization blocking barriers for polymer **2** by model A1 (left) and A2 (right), respectively. The

lowest 16 spin-orbit states are arranged according to the magnitude of their magnetic moments on the horizontal axis. The numbers next to arrows connecting two states display the average transition magnetic moment matrix element between the respective states.

**Table S5.** Energy ( $\text{cm}^{-1}$ ), magnetic anisotropy of the low-lying energy states arising from the ligand field splitting of the ground manifold  $J = 15/2$  and angles ( $^\circ$ ) between the main magnetic axes of the selected Kramers doublet and the ground Kramers doublet for the local  $\text{Dy}^{\text{III}}$  site in **1** and **2**, obtained in the *ab initio* calculations.

| KD | 1                    |        |                  | 2-model A1           |        |                  | 2- model A2          |        |                  |
|----|----------------------|--------|------------------|----------------------|--------|------------------|----------------------|--------|------------------|
|    | $E / \text{cm}^{-1}$ | $g$    | Angle / $^\circ$ | $E / \text{cm}^{-1}$ | $g$    | Angle / $^\circ$ | $E / \text{cm}^{-1}$ | $g$    | Angle / $^\circ$ |
| 1  | 0                    | 0.0002 | 0                | 0                    | 0.0000 | 0                | 0                    | 0.0000 | 0                |
|    |                      | 0.0002 |                  |                      | 0.0000 |                  |                      | 0.0001 |                  |
|    |                      | 19.935 |                  |                      | 19.970 |                  |                      | 19.966 |                  |
| 2  | 301.833              | 0.0018 | 1.1406           | 300.282              | 0.0071 | 0.5035           | 312.877              | 0.0096 | 0.6762           |
|    |                      | 0.0035 |                  |                      | 0.0081 |                  |                      | 0.0123 |                  |
|    |                      | 16.929 |                  |                      | 17.078 |                  |                      | 17.068 |                  |
| 3  | 485.417              | 2.7683 | 88.728           | 457.700              | 1.2824 | 87.824           | 490.532              | 1.4099 | 87.381           |
|    |                      | 5.7813 |                  |                      | 3.3984 |                  |                      | 1.6489 |                  |
|    |                      | 12.877 |                  |                      | 16.752 |                  |                      | 17.683 |                  |
| 4  | 502.673              | 0.6269 | 1.0010           | 500.022              | 1.4018 | 17.271           | 527.647              | 0.2407 | 4.9332           |
|    |                      | 4.1862 |                  |                      | 2.5978 |                  |                      | 2.3078 |                  |
|    |                      | 9.6789 |                  |                      | 10.316 |                  |                      | 11.970 |                  |
| 5  | 530.928              | 3.6260 | 78.669           | 513.874              | 2.8639 | 58.817           | 566.364              | 9.9856 | 11.979           |
|    |                      | 5.3479 |                  |                      | 4.4698 |                  |                      | 7.1253 |                  |
|    |                      | 7.0727 |                  |                      | 8.9317 |                  |                      | 1.8891 |                  |
| 6  | 596.164              | 0.2175 | 32.291           | 567.586              | 0.3789 | 25.444           | 610.829              | 2.7717 | 40.213           |
|    |                      | 3.0177 |                  |                      | 1.3328 |                  |                      | 3.4304 |                  |
|    |                      | 9.7420 |                  |                      | 8.3597 |                  |                      | 9.6813 |                  |
| 7  | 616.640              | 0.4964 | 38.107           | 613.501              | 1.4608 | 10.945           | 661.184              | 0.0818 | 47.450           |
|    |                      | 2.0483 |                  |                      | 4.6183 |                  |                      | 1.0672 |                  |
|    |                      | 13.526 |                  |                      | 10.686 |                  |                      | 14.764 |                  |
| 8  | 673.490              | 0.0014 | 58.196           | 619.324              | 9.4504 | 68.998           | 672.063              | 0.1081 | 50.673           |
|    |                      | 0.1686 |                  |                      | 5.3497 |                  |                      | 1.3091 |                  |
|    |                      | 18.521 |                  |                      | 0.6632 |                  |                      | 14.138 |                  |

## S6 References

- 1 F. Aquilante, J. Autschbach, R. K. Carlson, L. F. Chibotaru, M. G. Delcey, L. De Vico, I. Fdez. Galván, N. Ferré, L. M. Frutos, L. Gagliardi, M. Garavelli, A. Giussani, C. E. Hoyer, G. Li Manni, H. Lischka, D. Ma, P. Å. Malmqvist, T. Müller, A. Nenov, M. Olivucci, T. B. Pedersen, D. Peng, F. Plasser, B. Pritchard, M. Reiher, I. Rivalta, I. Schapiro, J. Segarra-Martí, M. Stenrup, D. G. Truhlar, L. Ungur, A. Valentini, S. Vancoillie, V. Veryazov, V. P. Vysotskiy, O. Weingart, F. Zapata and R. Lindh, Molcas 8: New capabilities for multiconfigurational quantum chemical calculations across the periodic table. *J. Comput. Chem.*, 2016, **37**, 506-541.
- 2 B. O. Roos, R. Lindh, P.-Å. Malmqvist, V. Veryazov, P.-O. Widmark and A. C. Borin, New relativistic atomic natural orbital basis sets for lanthanide atoms with applications to the Ce diatom and LuF<sub>3</sub>. *J. Phys. Chem. A.*, 2008, **112**, 11431-11435.
- 3 B. O. Roos, R. Lindh, P.-Å. Malmqvist, V. Veryazov and P.-O. Widmark, Main group atoms and dimers studied with a new relativistic ANO basis set. *J. Phys. Chem. A.*, 2004, **108**, 2851-2858.
- 4 B. O. Roos, R. Lindh, P.-Å. Malmqvist, V. Veryazov and P.-O. Widmark, New relativistic ANO basis sets for transition metal atoms. *J. Phys. Chem. A.*, 2005, **109**, 6575-6579.
- 5 P. Å. Malmqvist, B. O. Roos and B. Schimmelpfennig, The restricted active space (RAS) state interaction approach with spin-orbit coupling. *Chem. Phys. Lett.*, 2002, **357**, 230-240.
- 6 L. F. Chibotaru and L. Ungur, *Ab initio* calculation of anisotropic magnetic properties of complexes. I. Unique definition of pseudospin hamiltonians and their derivation. *J. Chem. Phys.*, 2012, **137**, 064112.
- 7 (a) Casanova, D.; Cirera, J.; Llunell, M.; Alemany, P.; Avnir, D.; Alvarez, S., Minimal Distortion Pathways in Polyhedral Rearrangements. *J. Am. Chem. Soc.*, 2004, **126** (6), 1755-1763. (b) D. Casanova, M. Llunell, P. Alemany and S. Alvarez, The rich stereochemistry of eight-vertex polyhedra, A continuous shape measures study. *Chem. Eur. J.*, 2005, **11**, 1479-1494. (c) S. Alvarez, P. Alemany, D. Casanova, J. Cirera, M. Llunell and D. Avnir, Shape maps and polyhedral interconversion paths in transition metal chemistry. *Coord. Chem. Rev.*, 2005, **249**, 1693-1708. (d) Cirera, J.; Ruiz, E.; Alvarez, S., Shape and Spin State in Four-Coordinate Transition-Metal Complexes: The Case of the d<sub>6</sub> Configuration. *Chem. Eur. J.*, 2006, **12** (11), 3162-3167.
